# Supplementary material for: Long-Term Efficacy and Safety of Modified Canaloplasty Versus Trabeculectomy in Open-Angle Glaucoma
Source: MDPI journal article supplement (doi:10.3390/life13020516), 2023-02-13
Supplement: s1 [file s1]

## Supplemental material 1: Cox regression analysis with additional variables

### Cox regression analysis for complete success

|                           | HR       | lower .95 | upper .95 | p value                    |
|---------------------------|----------|-----------|-----------|----------------------------|
| Age [years]               | 1.011841 | 0.9914    | 1.033     | 0.258                      |
| Sex (female)              | 1.315294 | 0.7954    | 2.175     | 0.285                      |
| Diagnose (NTG)            | 1.078282 | 0.5208    | 2.233     | 0.839                      |
| Diagnose (Secondary)      | 1.393801 | 0.7831    | 2.481     | 0.259                      |
| Method (Canaloplasty)     | 5.031579 | 3.0564    | 8.283     | $2.12 \times 10^{-10}$ *** |
| Preoperative MD [dB]      | 1.003420 | 0.9675    | 1.041     | 0.854                      |
| Duration glaucoma [years] | 0.995620 | 0.9705    | 1.021     | 0.736                      |

---

Signif. codes: 0 '\*\*\*' 0.001 '\*\*' 0.01 '\*' 0.05 '.' 0.1 ' ' 1

### Cox regression analysis for qualified success

|                           | HR     | lower .95 | upper .95 | p                          |
|---------------------------|--------|-----------|-----------|----------------------------|
| Age [years]               | 1.0155 | 0.9948    | 1.037     | 0.1439                     |
| Sex (female)              | 1.6629 | 0.9494    | 2.913     | 0.0753                     |
| Diagnose (NTG)            | 0.9902 | 0.4397    | 2.230     | 0.981                      |
| Diagnose (Secondary)      | 1.0638 | 0.5728    | 1.976     | 0.8447                     |
| Method (Canaloplasty)     | 6.2464 | 3.5443    | 11.009    | $2.35 \times 10^{-10}$ *** |
| Preoperative MD [dB]      | 0.9782 | 0.9404    | 1.018     | 0.2747                     |
| Duration glaucoma [years] | 0.9984 | 0.9711    | 1.027     | 0.9124                     |

---

Signif. codes: 0 '\*\*\*' 0.001 '\*\*' 0.01 '\*' 0.05 '.' 0.1 ' ' 1
